# Supplementary material for: Pan-cancer analysis of the prognostic value of C12orf75 based on data mining
Source: publisher site journal article supplement (doi:10.18632/aging.203081), 2021-06-01
Supplement: Supplementary file [file aging-v13i11-203081-supplementary-material-SD2.pdf]

## SUPPLEMENTARY TABLES

**Supplementary Table 1. *C12orf75* expression in cancerous versus normal tissue in ONCOMINE.**

| Cancer Site   | Cancer Type                                               | P Value  | Sample Size | Fold Change | Up/Down Regulated | Reference |
|---------------|-----------------------------------------------------------|----------|-------------|-------------|-------------------|-----------|
|               |                                                           |          |             |             | Gene Rank         | (PMID)    |
| Cervical      | Cervical Cancer                                           | 1.22E-09 | 20          | 5.543       | 368 (2%)          | 17510386  |
| Colorectal    | Colon Carcinoma                                           | 2.36E-08 | 5           | 2.962       | 479 (3%)          | 20957034  |
|               | Colon Adenoma                                             | 8.79E-06 | 5           | 1.8         | 861 (5%)          | 20957034  |
| Esophageal    | Esophageal Squamous Cell Carcinoma                        | 9.13E-14 | 51          | 2.423       | 596 (4%)          | 21385931  |
| Head and Neck | Tongue Carcinoma                                          | 2.68E-07 | 15          | 4.791       | 199 (2%)          | 17510386  |
|               | Oropharyngeal Carcinoma                                   | 2.96E-05 | 6           | 5.965       | 361 (2%)          | 17510386  |
|               | Oral Cavity Carcinoma                                     | 1.83E-04 | 4           | 6.719       | 411 (3%)          | 17510386  |
|               | Floor of the Mouth Carcinoma                              | 5.45E-04 | 5           | 7.062       | 1698 (9%)         | 17510386  |
|               | Oral Cavity Squamous Cell Carcinoma                       | 6.59E-13 | 57          | 2.582       | 428 (3%)          | 21853135  |
|               | Thyroid Gland Papillary Carcinoma                         | 2.69E-04 | 9           | 1.74        | 532 (3%)          | 16365291  |
| Kidney        | Chromophobe Renal Cell Carcinoma                          | 7.02E-06 | 4           | 9.054       | 28 (1%)           | 19445733  |
|               | Renal Oncocytoma                                          | 2.66E-05 | 4           | 9.057       | 155 (1%)          | 19445733  |
|               | Papillary Renal Cell Carcinoma                            | 7.24E-05 | 19          | 3.332       | 484 (3%)          | 19445733  |
| Leukemia      | T-Cell Acute Lymphoblastic Leukemia                       | 2.98E-08 | 10          | 3.713       | 227 (3%)          | 17410184  |
|               | B-Cell Acute Lymphoblastic Leukemia                       | 2.00E-12 | 86          | 2.787       | 283 (3%)          | 17410184  |
|               | T-Cell Acute Lymphoblastic Leukemia                       | 4.23E-30 | 174         | 2.379       | 718 (4%)          | 20406941  |
|               | Pro-B Acute Lymphoblastic Leukemia                        | 5.46E-19 | 70          | 2.343       | 1075 (6%)         | 20406941  |
|               | Chronic Myelogenous Leukemia                              | 2.90E-13 | 76          | -1.654      | 337 (2%)          | 20406941  |
| Liver         | Hepatocellular Carcinoma                                  | 4.88E-07 | 35          | 3.019       | 367 (2%)          | 17393520  |
| Lymphoma      | Germinal Center B-Cell-Like Diffuse Large B-Cell Lymphoma | 8.54E-04 | 16          | -1.786      | 251 (9%)          | 10676951  |
| Myeloma       | Monoclonal Gammopathy of Undetermined Significance        | 4.87E-07 | 44          | -2.004      | 265 (2%)          | 17023574  |
| Melanoma      | Skin Squamous Cell Carcinoma                              | 2.20E-04 | 11          | 3.278       | 917 (5%)          | 18442402  |
| Seminoma      | Mixed Germ Cell Tumor                                     | 1.01E-07 | 41          | -2.284      | 1681 (10%)        | 16424014  |
| Ovarian       | Ovarian Clear Cell Adenocarcinoma                         | 7.22E-04 | 7           | 4.867       | 285 (2%)          | 15161682  |
| Prostate      | Prostate Carcinoma                                        | 1.28E-15 | 62          | -2.285      | 75 (1%)           | 14711987  |
|               | Prostate Carcinoma                                        | 6.78E-04 | 13          | -3.022      | 547 (3%)          | 19737960  |

**Supplementary Table 2. Prognostic analysis of *C12orf75* expression for overall survival in the clinicopathologic features of TCGA-BLCA.**

| Variable                        | Group A vs. Group B |                        |              |                        | Univariate Cox    |        | Multivariate Cox |       |
|---------------------------------|---------------------|------------------------|--------------|------------------------|-------------------|--------|------------------|-------|
|                                 | Group A             | Total No. Patients (%) | Group B      | Total No. Patients (%) | HR (95% CI)       | P      | HR (95% CI)      | P     |
| <i>C12orf75</i>                 | High Group          | 203 (50%)              | Low Group    | 203 (50%)              | 1.39 (1.04–1.87)  | 0.027  | 2.28 (1.13–4.58) | 0.021 |
| Age                             | ≥60                 | 356 (78%)              | <60          | 98 (22%)               | 1.96 (1.28–3.02)  | 0.002  | 1.59 (0.54–4.72) | 0.403 |
| Extracapsular Extension Status  | Focal               | 38 (68%)               | Extensive    | 18 (32%)               | 1.15 (0.5–2.63)   | 0.749  |                  |       |
| Clinical T                      | T 3–4               | 63 (32%)               | T 1–2        | 132 (68%)              | 1.44 (0.9–2.31)   | 0.127  |                  |       |
| Diagnosis Subtype               | Papillary           | 141 (31%)              | On-Papillary | 307 (69%)              | 0.69 (0.49–0.98)  | 0.035  | 1.46 (0.66–3.22) | 0.349 |
| Disease Extracapsular Extension | YES                 | 77 (44%)               | NO           | 97 (56%)               | 1.29 (0.83–2.01)  | 0.255  |                  |       |
| Gleason Score                   | >7                  | 32 (35%)               | ≤6           | 60 (65%)               | 0.89 (0.46–1.74)  | 0.74   |                  |       |
| Lymphovascular Invasion         | YES                 | 170 (55%)              | NO           | 139 (45%)              | 2.33 (1.6–3.39)   | <0.001 | 2.3 (0.98–5.39)  | 0.056 |
| Histologic Grade                | High                | 429 (95%)              | Low          | 21 (5%)                | 2.95 (0.73–11.93) | 0.111  |                  |       |
| Lymphonodus Positive            | Positive            | 134 (40%)              | Negative     | 198 (60%)              | 2.02 (1.46–2.81)  | <0.001 | 1.39 (0.62–3.12) | 0.42  |
| Pathologic M                    | MI                  | 11 (5%)                | MO           | 220 (95%)              | 1.08 (0.73–1.6)   | 0.7    |                  |       |
| Pathologic T                    | T3–4                | 288 (69%)              | T1–2         | 132 (31%)              | 3.22 (1.54–6.73)  | 0.001  | 1.37 (0.38–4.93) | 0.632 |
| Gender                          | Male                | 330 (73%)              | Female       | 124 (27%)              | 1.28 (0.68–2.43)  | 0.44   |                  |       |
| Race                            | Asian               | 44 (11%)               | White        | 366 (89%)              | 0.86 (0.62–1.19)  | 0.353  |                  |       |
| Tumor Stage                     | Stage III–IV        | 311 (69%)              | Stage I–II   | 141 (31%)              | 0.62 (0.31–1.21)  | 0.156  |                  |       |
| BMI                             | ≥25                 | 223 (58%)              | <25          | 161 (42%)              | 2.26 (1.56–3.27)  | <0.001 | 0.95 (0.14–6.47) | 0.961 |
| Number Pack Years Smoked        | >30                 | 118 (47%)              | ≤30          | 132 (53%)              | 1.03 (0.74–1.43)  | 0.87   |                  |       |

P value for two-sided Wald test; Abbreviations: HR: hazard ratio; CI: confidence interval; BMI: Body Mass Index.

**Supplementary Table 3. Prognostic analysis of *C12orf75* expression for overall survival in the clinicopathologic features of TCGA- LIHC.**

| Variable                            | Group A vs. Group B |                        |            |                        | Univariate Cox    |          | Multivariate Cox  |          |
|-------------------------------------|---------------------|------------------------|------------|------------------------|-------------------|----------|-------------------|----------|
|                                     | Group A             | Total No. Patients (%) | Group B    | Total No. Patients (%) | HR (95% CI)       | <i>p</i> | HR (95% CI)       | <i>p</i> |
| <i>C12orf75</i>                     | High Group          | 184 (50%)              | Low Group  | 184 (50%)              | 1.83 (1.29–2.6)   | 0.001    | 1.87 (1.19–2.96)  | 0.007    |
| Adjacent Tissue Inflammation Extent | YES                 | 146 (47%)              | NO         | 162 (53%)              | 1.15 (0.71–1.87)  | 0.564    |                   |          |
| Age                                 | ≥60                 | 270 (58%)              | <60        | 198 (42%)              | 1.19 (0.84–1.69)  | 0.327    |                   |          |
| Albumin                             | <3.5g/dl            | 87 (23%)               | ≥3.5g/dl   | 291 (77%)              | 1.12 (0.69–1.83)  | 0.651    |                   |          |
| Child-Pugh Classification           | B+C(1)              | 33 (11%)               | A          | 271 (89%)              | 1.64 (0.81–3.33)  | 0.164    |                   |          |
| Creatinine                          | >1.2mg/dl           | 57 (15%)               | ≤1.2mg/dl  | 327 (85%)              | 0.89 (0.5–1.6)    | 0.699    |                   |          |
| Fetoprotein                         | ≥200ng/ml           | 96 (27%)               | <200ng/ml  | 259 (73%)              | 1.1 (0.69–1.75)   | 0.691    |                   |          |
| Fibrosis Ishak Score                | 1–6                 | 167 (58%)              | 0          | 119 (42%)              | 0.74 (0.45–1.22)  | 0.238    |                   |          |
| Neoplasm Histologic Grade           | G3–4                | 166 (36%)              | G1–2       | 295 (64%)              | 1.11 (0.78–1.59)  | 0.557    |                   |          |
| Pathologic M                        | M1                  | 6 (2%)                 | M0         | 337 (98%)              | 3.96 (1.24–12.58) | 0.012    | 3.54 (1.03–12.14) | 0.044    |
| Pathologic N                        | N1                  | 6 (2%)                 | N0         | 312 (98%)              | 2 (0.49–8.17)     | 0.323    |                   |          |
| Pathologic T                        | T3–4                | 123 (26%)              | T1–2       | 343 (74%)              | 2.56 (1.8–3.64)   | <0.001   | 1.68 (0.23–12.39) | 0.611    |
| Platelet                            | <150                | 89 (23%)               | ≥150       | 302 (77%)              | 0.94 (0.57–1.53)  | 0.797    |                   |          |
| Family Cancer History               | YES                 | 162 (40%)              | NO         | 248 (60%)              | 1.19 (0.82–1.72)  | 0.352    |                   |          |
| Vascular Tumor                      | YES                 | 134 (33%)              | NO         | 270 (67%)              | 1.32 (0.87–2)     | 0.188    |                   |          |
| Gender                              | Male                | 309 (66%)              | Female     | 160 (34%)              | 0.8 (0.56–1.14)   | 0.219    |                   |          |
| Race                                | Asian               | 171 (40%)              | White      | 257 (60%)              | 0.76 (0.52–1.1)   | 0.143    |                   |          |
| Tumor Stage                         | Stage III–IV        | 116 (27%)              | Stage I–II | 319 (73%)              | 2.46 (1.7–3.57)   | <0.001   | 1.05 (0.14–7.77)  | 0.958    |
| BMI                                 | ≥25                 | 208 (50%)              | <25        | 209 (50%)              | 0.81 (0.56–1.18)  | 0.28     |                   |          |
| Weight of Samples                   | >160g               | 229 (49%)              | ≤160g      | 240 (51%)              | 3.21 (2.23–4.62)  | <0.001   | 3.59 (2.19–5.87)  | <0.001   |

*P* value for two-sided Wald test; Abbreviations: HR: hazard ratio; CI: confidence interval; BMI: Body Mass Index.

**Supplementary Table 4. Prognostic analysis of *C12orf75* expression for overall survival in the clinicopathologic features of TCGA- UVM.**

| Variable               | Group A vs. Group B |                        |            |                        | Univariate Cox    |          | Multivariate Cox  |          |
|------------------------|---------------------|------------------------|------------|------------------------|-------------------|----------|-------------------|----------|
|                        | Group A             | Total No. Patients (%) | Group B    | Total No. Patients (%) | HR (95% CI)       | <i>p</i> | HR (95% CI)       | <i>p</i> |
| C12orf75               | High Group          | 40 (50%)               | Low Group  | 40 (50%)               | 7.08 (2.6–19.25)  | <0.001   | 5.88 (1.94–17.8)  | 0.002    |
| Age                    | ≥60                 | 44 (55%)               | <60        | 36 (45%)               | 1.84 (0.79–4.27)  | 0.151    |                   |          |
| Clinical T             | T4                  | 38 (49%)               | T2-3       | 40 (51%)               | 2.42 (0.96–6.06)  | 0.052    |                   |          |
| Clinical Stage         | Stage III-IV        | 44 (55%)               | Stage II   | 36 (45%)               | 1.72 (0.7–4.19)   | 0.229    |                   |          |
| Extrascleral Extension | YES                 | 7 (9%)                 | NO         | 68 (91%)               | 4.64 (1.5–14.37)  | 0.003    | 2.02 (0.62–6.57)  | 0.242    |
| Pathologic T           | T4                  | 34 (42%)               | T2-3       | 46 (58%)               | 1.74 (0.76–3.99)  | 0.187    |                   |          |
| Radiation Therapy      | YES                 | 8 (12%)                | NO         | 58 (88%)               | 2.71 (0.68–10.87) | 0.143    |                   |          |
| Tumor Basal Diameter   | ≥17                 | 40 (51%)               | <17        | 39 (49%)               | 2.49 (1–6.18)     | 0.043    | 2.97 (0.75–11.75) | 0.121    |
| Tumor Shape            | Mushroom            | 13 (27%)               | Dome       | 36 (73%)               | 0.58 (0.16–2.06)  | 0.392    |                   |          |
| Gender                 | Male                | 45 (56%)               | Female     | 35 (44%)               | 1.54 (0.65–3.65)  | 0.321    |                   |          |
| Tumor Stage            | Stage III-IV        | 40 (51%)               | Stage I-II | 39 (49%)               | 1.5 (0.63–3.58)   | 0.356    |                   |          |
| BMI                    | ≥25                 | 36 (68%)               | <25        | 17 (32%)               | 1.17 (0.37–3.68)  | 0.789    |                   |          |
| Weight of Samples      | >40                 | 37 (48%)               | ≤40        | 40 (52%)               | 1.11 (0.47–2.61)  | 0.812    |                   |          |

*P* value for two-sided Wald test; Abbreviations: HR: hazard ratio; CI: confidence interval; BMI: Body Mass Index.

**Supplementary Table 5. Prognostic analysis of *C12orf75* expression for overall survival in the clinicopathologic features of TCGA- KIRP.**

| Variable              | Group A vs. Group B |                        |           |                        | Univariate Cox    |          | Multivariate Cox |          |
|-----------------------|---------------------|------------------------|-----------|------------------------|-------------------|----------|------------------|----------|
|                       | Group A             | Total No. Patients (%) | Group B   | Total No. Patients (%) | HR (95% CI)       | <i>p</i> | HR (95% CI)      | <i>p</i> |
| C12orf75              | High Group          | 143 (50%)              | Low Group | 143 (50%)              | 0.52 (0.28–0.97)  | 0.036    | 0.3 (0.11–0.82)  | 0.019    |
| Age                   | ≥60                 | 224 (59%)              | <60       | 154 (41%)              | 1.04 (0.56–1.94)  | 0.888    |                  |          |
| Clinical T            | T3-4                | 57 (21%)               | T1-2      | 210 (79%)              | 4.66 (2.28–9.53)  | <0.001   | 1.53 (0.44–5.4)  | 0.507    |
| Hemoglobin            | Low                 | 128 (48%)              | Normal    | 141 (52%)              | 4.4 (1.88–10.26)  | <0.001   | 2.59 (1.04–6.46) | 0.041    |
| Lactate Dehydrogenase | Elevated            | 11 (23%)               | Normal    | 36 (77%)               | 1.88 (0.36–9.77)  | 0.443    |                  |          |
| Laterality            | Right               | 168 (44%)              | Left      | 210 (56%)              | 0.74 (0.39–1.38)  | 0.342    |                  |          |
| Pathologic T          | T3-4                | 91 (24%)               | T1-2      | 286 (76%)              | 5.07 (2.76–9.3)   | <0.001   | 2.73 (0.77–9.65) | 0.118    |
| Serum Calcium         | Low + Elevated      | 68 (29%)               | Normal    | 169 (71%)              | 1.66 (0.75–3.66)  | 0.205    |                  |          |
| White Cell Count      | Low + Elevated      | 72 (27%)               | Normal    | 196 (73%)              | 1.44 (0.67–3.09)  | 0.353    |                  |          |
| Gender                | Male                | 282 (74%)              | Female    | 99 (26%)               | 0.63 (0.33–1.21)  | 0.164    |                  |          |
| Race                  | Black               | 75 (21%)               | White     | 277 (79%)              | 0.92 (0.41–2.09)  | 0.853    |                  |          |
| BMI                   | ≥25                 | 208 (76%)              | <25       | 67 (24%)               | 0.71 (0.32–1.55)  | 0.39     |                  |          |
| Pack Years Smoked     | ≥24                 | 43 (49%)               | <24       | 45 (51%)               | 3.38 (0.71–16.06) | 0.104    |                  |          |
| Initial Weight        | >170                | 101 (49%)              | ≤170      | 107 (51%)              | 0.81 (0.36–1.83)  | 0.615    |                  |          |
| Longest Dimension     | >1.7                | 36 (21%)               | ≤1.7      | 137 (79%)              | 0.79 (0.26–2.37)  | 0.672    |                  |          |

*P* value for two-sided Wald test; Abbreviations: HR: hazard ratio; CI: confidence interval; BMI: Body Mass Index.

**Supplementary Table 6. Analysis of correlations expression between *C12orf75* and Gene Markers of Immune Cells in MESO, UCS, and UVM by TIMER.**

| Cell type         | Gene marker | MESO (n = 87) |        | UCS (n = 57) |        | UVM (n = 80) |        |       |
|-------------------|-------------|---------------|--------|--------------|--------|--------------|--------|-------|
|                   |             | Cor           | p      | Cor          | p      | Cor          | p      |       |
| B cell            | CD19        | 0.136         | 0.353  | 0.102        | 0.354  | 0.233        | *      |       |
|                   | MS4A1       | 0.078         | 0.591  | 0.183        | 0.591  | 0.281        | **     |       |
|                   | CD38        | 0.140         | 0.353  | 0.339        | 0.354  | 0.419        | ***    |       |
| CD8+ T Cell       | CD8A        | 0.278         | 0.075  | 0.215        | 0.076  | 0.565        | ***    |       |
|                   | CD8B        | 0.232         | 0.096  | 0.149        | 0.097  | 0.582        | ***    |       |
|                   | Tfh         | CXCR5         | 0.104  | 0.473        | -0.092 | 0.474        | 0.382  | ***   |
| Tfh               | ICOS        | 0.092         | 0.473  | 0.224        | 0.474  | 0.561        | ***    |       |
|                   | BCL6        | 0.344         | *      | -0.137       | *      | 0.252        | *      |       |
|                   | Th1         | IL12RB2       | 0.178  | 0.258        | 0.092  | 0.259        | -0.485 | ***   |
| Th1               | IL27RA      | 0.137         | 0.415  | 0.354        | 0.415  | 0.573        | ***    |       |
|                   | TBX21       | 0.039         | 0.669  | 0.177        | 0.67   | 0.434        | ***    |       |
|                   | Th2         | CCR3          | 0.111  | 0.415        | 0.102  | 0.415        | 0.375  | ***   |
| Th2               | STAT6       | -0.165        | 0.272  | 0.355        | 0.273  | 0.457        | ***    |       |
|                   | GATA3       | 0.137         | 0.342  | 0.130        | 0.343  | 0.531        | ***    |       |
|                   | Th9         | TGFBR2        | 0.265  | 0.080        | 0.185  | 0.08         | 0.243  | *     |
| Th9               | IRF4        | 0.071         | 0.591  | -0.153       | 0.591  | -0.003       | 0.655  |       |
|                   | TNF         | 0.036         | 0.598  | 0.161        | 0.598  | 0.531        | ***    |       |
|                   | Th17        | IL21R         | 0.235  | 0.090        | -0.055 | 0.091        | 0.524  | ***   |
| Th17              | IL23R       | 0.009         | 0.821  | 0.057        | 0.821  | 0.304        | **     |       |
|                   | STAT3       | 0.086         | 0.591  | -0.041       | 0.591  | 0.599        | ***    |       |
|                   | Th22        | CCR10         | 0.086  | 0.706        | -0.295 | 0.706        | 0.311  | **    |
| Th22              | AHR         | 0.390         | *      | 0.279        | *      | 0.513        | ***    |       |
|                   | Treg        | FOXP3         | 0.148  | 0.393        | 0.234  | 0.393        | 0.398  | ***   |
|                   | Treg        | CCR8          | 0.212  | 0.258        | 0.264  | 0.259        | 0.343  | ***   |
| IL2RA             |             | 0.107         | 0.591  | 0.166        | 0.591  | 0.408        | ***    |       |
| T cell exhaustion |             | PDCD1         | 0.032  | 0.677        | 0.051  | 0.677        | 0.618  | ***   |
| T cell exhaustion | CTLA4       | 0.061         | 0.591  | 0.155        | 0.591  | 0.482        | ***    |       |
|                   | Macrophage  | CD68          | 0.083  | 0.591        | 0.173  | 0.591        | 0.244  | *     |
|                   | ITGAM       | 0.238         | 0.090  | 0.035        | 0.091  | 0.440        | ***    |       |
| M1                | NOS2        | 0.060         | 0.805  | -0.119       | 0.806  | 0.258        | **     |       |
|                   | ROS1        | 0.288         | 0.050  | -0.041       | 0.05   | -0.178       | 0.187  |       |
|                   | M2          | ARG1          | -0.060 | 0.805        | 0.064  | 0.806        | 0.049  | 0.438 |
| M2                | MRC1        | 0.036         | 0.926  | 0.163        | 0.926  | 0.362        | ***    |       |
|                   | TAM         | HLA-G         | -0.134 | 0.591        | 0.425  | 0.591        | 0.404  | ***   |
|                   | TAM         | CD80          | 0.010  | 0.985        | 0.055  | 0.986        | 0.284  | **    |
| CD86              |             | 0.155         | 0.346  | 0.121        | 0.347  | 0.586        | ***    |       |
| Monocyte          |             | CD14          | 0.134  | 0.353        | 0.170  | 0.354        | 0.552  | ***   |
| Monocyte          | FCGR3A      | 0.168         | 0.298  | 0.066        | 0.298  | 0.532        | ***    |       |
|                   | NK          | XCL1          | 0.171  | 0.258        | 0.037  | 0.259        | 0.391  | ***   |
|                   | NK          | KIR3DL1       | 0.123  | 0.353        | 0.262  | 0.354        | 0.258  | **    |
| CD7               |             | 0.146         | 0.320  | 0.139        | 0.321  | 0.599        | ***    |       |
| Neutrophil        |             | FUT4          | 0.488  | ***          | -0.029 | ***          | 0.303  | **    |
| Neutrophil        | MPO         | -0.059        | 0.926  | -0.129       | 0.926  | 0.016        | 0.991  |       |
|                   | DC          | CD1C          | 0.035  | 0.926        | 0.047  | 0.926        | 0.214  | *     |
|                   | THBD        | 0.203         | 0.180  | -0.145       | 0.181  | 0.390        | ***    |       |

Cor value of Spearman's correlation. *p* values were corrected using the Benjamini-Hochberg method. \* *p* < 0.05; \*\* *p* < 0.01; \*\*\* *p* < 0.001.

**Supplementary Table 7. DNA Methylation Analysis of *C12orf75* in pan-cancer by DNMIIVD.**

| DNMIIVD |             |                  |                        |                   |                         |
|---------|-------------|------------------|------------------------|-------------------|-------------------------|
| Disease | Gene Symbol | Pearson <i>r</i> | Pearson <i>p</i> value | Spearman <i>r</i> | Spearman <i>p</i> value |
| BLCA    | C12orf75    | -0.181           | 0.000                  | -0.162            | 0.001                   |
| BRCA    | C12orf75    | -0.153           | 0.000                  | 0.004             | 0.903                   |
| CESC    | C12orf75    | -0.035           | 0.535                  | 0.011             | 0.847                   |
| CHOL    | C12orf75    | -0.072           | 0.640                  | -0.158            | 0.299                   |
| COAD    | C12orf75    | 0.002            | 0.975                  | -0.032            | 0.566                   |
| ESCA    | C12orf75    | -0.207           | 0.007                  | -0.078            | 0.311                   |
| GBM     | C12orf75    | 0.040            | 0.753                  | -0.013            | 0.917                   |
| HNSC    | C12orf75    | -0.006           | 0.883                  | 0.071             | 0.104                   |
| KIRC    | C12orf75    | -0.049           | 0.363                  | -0.048            | 0.377                   |
| KIRP    | C12orf75    | 0.132            | 0.023                  | 0.151             | 0.009                   |
| LIHC    | C12orf75    | -0.119           | 0.016                  | -0.153            | 0.002                   |
| LUAD    | C12orf75    | -0.259           | 9.8e-9                 | -0.229            | 4.548e-7                |
| LUSC    | C12orf75    | -0.151           | 0.003                  | -0.131            | 0.011                   |
| PAAD    | C12orf75    | -0.070           | 0.346                  | -0.119            | 0.111                   |
| PCPG    | C12orf75    | -0.040           | 0.591                  | -0.006            | 0.930                   |
| PRAD    | C12orf75    | 0.038            | 0.380                  | 0.043             | 0.319                   |
| READ    | C12orf75    | -0.125           | 0.212                  | -0.169            | 0.092                   |
| SARC    | C12orf75    | 0.102            | 0.098                  | 0.107             | 0.084                   |
| SKCM    | C12orf75    | -0.051           | 0.270                  | 0.020             | 0.672                   |
| STAD    | C12orf75    | -0.183           | 0.001                  | -0.078            | 0.156                   |
| THCA    | C12orf75    | -0.118           | 0.005                  | -0.103            | 0.015                   |
| THYM    | C12orf75    | 0.122            | 0.181                  | 0.084             | 0.362                   |
